# Supplementary material for: Post-Translational Modifications of Histone Variants in the Absence and Presence of a Methionine-Depleting Enzyme in Normal and Cancer Cells
Source: MDPI journal article supplement (doi:10.3390/cancers15020527), 2023-01-15
Supplement: s1 [file s1]

**Table S1.** Effects of MGL50 on PTMs of H1 histone variant in Hs27 and HT-29 cells. Cells were seeded (2.5x10<sup>5</sup> cells/well) into 12-well plates, were treated with 0.03 mg/mL MGL (MGL50) for 48 h and then were collected. Histones were extracted and peptides were analyzed by mass spectrometry. Data are represented as mean and standard error. NT, non-treated; MGL50, concentration of MGL able to reduce cell viability to 50%. Heteroscedastic two-tails t-test are applied and statistical analysis was carried out comparing Hs27 treated vs not treated, HT-29 treated vs not treated, HT-29 non treated vs Hs27 non treated. p-value are reported as -log2. Statistically significant differences are highlighted in green.

|                                                | mean       |        |             |        | standard error |        |             |        |               |         |                |         |              |         |
|------------------------------------------------|------------|--------|-------------|--------|----------------|--------|-------------|--------|---------------|---------|----------------|---------|--------------|---------|
|                                                | Hs27 cells |        | HT-29 cells |        | Hs27 cells     |        | HT-29 cells |        | Hs27 MGL50/NT | p-value | HT-29 MGL50/NT | p-value | HT29/Hs27 NT | p-value |
|                                                | NT         | MGL50  | NT          | MGL50  | NT             | MGL50  | NT          | MGL50  |               |         |                |         |              |         |
| H14_25_32 unmod                                | 65.51%     | 76.43% | 62.88%      | 61.05% | 13.62%         | 7.39%  | 5.28%       | 13.86% | 0.22          | 1.19    | -0.03          | 0.12    | -0.07        | 0.31    |
| H14_25_32 K25me1                               | 25.55%     | 18.21% | 11.73%      | 27.08% | 13.95%         | 7.10%  | 5.97%       | 14.57% | -0.49         | 0.74    | -0.23          | 0.44    | 0.31         | 0.63    |
| H14_25_32 K25me2                               | 0.00%      | 0.00%  | 0.00%       | 0.01%  | 0.00%          | 0.00%  | 0.00%       | 0.01%  | 0.00          | 0.00    | 0.00           | 0.00    | 0.00         | 0.00    |
| H14_25_32 K25me3                               | 0.50%      | 0.41%  | 1.62%       | 1.51%  | 0.24%          | 0.14%  | 0.12%       | 1.15%  | -0.27         | 0.46    | -0.10          | 0.12    | 1.69         | 7.15    |
| H14_25_32 K25ac                                | 2.75%      | 0.22%  | 1.89%       | 1.63%  | 1.36%          | 0.12%  | 0.73%       | 1.22%  | -3.67         | 2.74    | -0.21          | 0.26    | -0.54        | 0.90    |
| H14_25_32 K31ac                                | 4.94%      | 3.42%  | 2.38%       | 8.04%  | 1.09%          | 0.45%  | 0.71%       | 3.96%  | -0.53         | 2.39    | 1.75           | 2.64    | -1.05        | 3.75    |
| H14_25_32 S26ac                                | 0.74%      | 1.31%  | 0.00%       | 0.68%  | 0.65%          | 1.60%  | 0.00%       | 0.84%  | 0.82          | 0.50    | 0.00           | 0.00    | 0.00         | 0.00    |
| H14_25_32 S26ph                                | 0.01%      | 0.00%  | 0.00%       | 0.00%  | 0.02%          | 0.00%  | 0.00%       | 0.00%  | 0.00          | 0.00    | 0.00           | 0.00    | 0.00         | 0.00    |
| H12_33_53 unmod                                | 59.22%     | 67.97% | 60.12%      | 70.05% | 1.19%          | 2.82%  | 4.58%       | 0.44%  | 0.19          | 5.11    | 0.22           | 3.11    | 0.02         | 0.27    |
| H12_33_53 K33me1                               | 40.60%     | 32.43% | 39.72%      | 29.91% | 1.16%          | 2.82%  | 4.60%       | 0.46%  | -0.32         | 5.03    | -0.41          | 3.07    | -0.03        | 0.27    |
| H12_33_53 K33me2                               | 0.02%      | 0.00%  | 0.09%       | 0.04%  | 0.03%          | 0.00%  | 0.05%       | 0.02%  | 0.00          | 0.00    | -1.31          | 1.94    | 1.89         | 2.27    |
| H12_33_53 K33me3                               | 0.15%      | 0.00%  | 0.05%       | 0.00%  | 0.06%          | 0.00%  | 0.05%       | 0.00%  | 0.00          | 0.00    | 0.00           | 0.00    | -1.72        | 2.69    |
| H12_33_53 K33ac                                | 0.00%      | 0.00%  | 0.02%       | 0.00%  | 0.00%          | 0.00%  | 0.03%       | 0.00%  | 0.00          | 0.00    | 0.00           | 0.00    | 0.00         | 0.00    |
| H15_36_56 unmod                                | 22.33%     | 16.11% | 22.57%      | 16.88% | 0.29%          | 4.84%  | 3.52%       | 0.55%  | -0.47         | 1.97    | -0.42          | 2.45    | 0.02         | 0.09    |
| H15_36_56 K36me2                               | 0.01%      | 0.00%  | 0.01%       | 0.00%  | 0.01%          | 0.00%  | 0.02%       | 0.00%  | 0.00          | 0.00    | 0.00           | 0.00    | 0.24         | 0.13    |
| H15_36_56 K36me3                               | 38.75%     | 42.50% | 38.63%      | 41.48% | 0.14%          | 2.17%  | 1.77%       | 0.26%  | 0.13          | 2.58    | 0.10           | 2.43    | 0.00         | 0.08    |
| H15_36_56 K36ac                                | 38.38%     | 41.39% | 38.59%      | 41.44% | 0.46%          | 2.72%  | 1.82%       | 0.24%  | 0.11          | 1.99    | 0.10           | 2.37    | 0.01         | 0.16    |
| H15_36_56 S43ac                                | 0.53%      | 0.00%  | 0.19%       | 0.20%  | 0.50%          | 0.00%  | 0.05%       | 0.05%  | 0.00          | 0.00    | 0.10           | 0.26    | -1.51        | 1.03    |
| H1_1_35 H12.SETAPAAPAAPAEKAPVKKAAKAGGTPR       | 0.90%      | 0.30%  | 0.06%       | 0.26%  | 0.99%          | 0.37%  | 0.07%       | 0.31%  | -1.57         | 0.92    | 2.07           | 1.00    | -3.88        | 1.29    |
| H1_1_35 H14.SETAPAAPAAPAEKTPVKKKAR             | 66.91%     | 71.50% | 74.49%      | 49.38% | 2.46%          | 11.84% | 3.25%       | 20.63% | 0.10          | 0.59    | -0.59          | 1.87    | 0.15         | 3.56    |
| H1_1_35 H15.SETAPAEATAPAPVEKSPAKKATKKAAGAGAAKR | 32.19%     | 28.19% | 25.45%      | 50.37% | 1.62%          | 11.84% | 3.18%       | 20.32% | -0.19         | 0.47    | 0.98           | 1.89    | -0.34        | 3.61    |
| H1_54_81 H11.GGVSLAALKKALAAAGYDVEKNNSR         | 0.00%      | 33.87% | 0.06%       | 1.02%  | 0.00%          | 20.91% | 0.07%       | 0.68%  | 0.00          | 0.00    | 3.98           | 2.14    | 0.00         | 0.00    |
| H1_54_81 H1v234.SGVSLAALKKALAAAGYDVEKNNSR      | 78.16%     | 62.15% | 79.64%      | 68.16% | 13.54%         | 23.41% | 6.28%       | 3.56%  | -0.33         | 0.98    | -0.22          | 3.02    | 0.03         | 0.14    |
| H1_54_81 H15.NGLSLAALKKALAAAGYDVEKNNSR         | 21.84%     | 3.98%  | 20.29%      | 30.82% | 13.54%         | 2.52%  | 6.27%       | 2.88%  | -2.46         | 2.41    | 0.60           | 2.89    | -0.11        | 0.14    |

**Table S2.** Effects of MGL50 on PTMs of H2A histone variant in Hs27 and HT-29 cells. Cells were seeded ( $2.5 \times 10^5$  cells/well) into 12-well plates, were treated with 0.03 mg/mL MGL (MGL50) for 48 h and then were collected. Histones were extracted and peptides were analyzed by mass spectrometry. Data are represented as mean and standard error. NT, non-treated; MGL50, concentration of MGL able to reduce cell viability to 50%. Heteroscedastic two-tails t-test are applied and statistical analysis was carried out comparing Hs27 treated vs not treated, HT-29 treated vs not treated, HT-29 non treated vs Hs27 non treated. p-value are reported as -log2. Statistically significant differences are highlighted in green.

|                                  | mean       |         |             |        | standard error |        |             |        | Hs27 MGL50/NT | p-value | HT-29 MGL50/NT | p-value | HT29/Hs27 NT | p-value |
|----------------------------------|------------|---------|-------------|--------|----------------|--------|-------------|--------|---------------|---------|----------------|---------|--------------|---------|
|                                  | Hs27 cells |         | HT-29 cells |        | Hs27 cells     |        | HT-29 cells |        |               |         |                |         |              |         |
|                                  | NT         | MGL50   | NT          | MGL50  | NT             | MGL50  | NT          | MGL50  |               |         |                |         |              |         |
| H2A1_36_42 unmod                 | 98.62%     | 99.65%  | 99.73%      | 99.90% | 0.91%          | 0.43%  | 0.14%       | 0.12%  | 0.02          | 1.84    | 0.00           | 1.74    | 0.02         | 1.87    |
| H2A1_36_42 K36ac                 | 0.05%      | 0.00%   | 0.27%       | 0.10%  | 0.06%          | 0.00%  | 0.14%       | 0.12%  | 0.00          | 0.00    | -1.49          | 1.74    | 2.42         | 2.80    |
| H2A1_36_42 Y39ac                 | 1.33%      | 0.35%   | 0.00%       | 0.00%  | 0.87%          | 0.43%  | 0.00%       | 0.00%  | -1.93         | 1.83    | 0.00           | 0.00    | 0.00         | 0.00    |
| H2A3_36_42 unmod                 | 66.67%     | 0.00%   | 100.00%     | 95.91% | 40.82%         | 0.00%  | 0.00%       | 5.00%  | 0.00          | 0.00    | -0.06          | 0.00    | 0.58         | 0.00    |
| H2A3_36_42 Y39ac                 | 0.00%      | 0.00%   | 0.00%       | 4.09%  | 0.00%          | 0.00%  | 0.00%       | 5.00%  | 0.00          | 0.00    | 0.00           | 0.00    | 0.00         | 0.00    |
| H2AX_36_42 unmod                 | 100.00%    | 66.67%  | 98.99%      | 98.86% | 0.00%          | 40.82% | 1.24%       | 1.40%  | -0.58         | 0.00    | 0.00           | 0.10    | -0.01        | 0.00    |
| H2AX_36_42 Y39ac                 | 0.00%      | 0.00%   | 1.01%       | 1.14%  | 0.00%          | 0.00%  | 1.24%       | 1.40%  | 0.00          | 0.00    | 0.18           | 0.10    | 0.00         | 0.00    |
| H2A1_4_11 unmod                  | 73.43%     | 85.29%  | 93.18%      | 87.47% | 2.46%          | 8.14%  | 1.37%       | 5.15%  | 0.22          | 2.62    | -0.09          | 1.95    | 0.34         | 9.95    |
| H2A1_4_11 K5ac                   | 0.61%      | 0.23%   | 1.76%       | 1.15%  | 0.74%          | 0.23%  | 1.07%       | 0.72%  | -1.40         | 0.78    | -0.62          | 0.75    | 1.53         | 1.55    |
| H2A1_4_11 K9ac                   | 1.66%      | 1.48%   | 1.26%       | 0.86%  | 0.77%          | 0.86%  | 0.79%       | 0.54%  | -0.17         | 0.23    | -0.56          | 0.66    | -0.39        | 0.55    |
| H2A1_4_11 K5acK9ac               | 0.01%      | 0.00%   | 0.22%       | 0.26%  | 0.01%          | 0.00%  | 0.05%       | 0.11%  | 0.00          | 0.00    | 0.22           | 0.46    | 4.96         | 7.29    |
| H2A1_4_11 K9me1                  | 13.59%     | 6.33%   | 0.98%       | 2.30%  | 4.18%          | 6.30%  | 0.80%       | 2.74%  | -1.10         | 1.71    | 1.23           | 0.74    | -3.80        | 5.49    |
| H2A1_4_11 K5me1                  | 10.70%     | 6.68%   | 2.60%       | 7.97%  | 1.74%          | 4.14%  | 0.39%       | 3.84%  | -0.68         | 1.58    | 1.62           | 2.13    | -2.04        | 7.61    |
| H2A1_4_11 unmod                  | 6.33%      | 0.90%   | 19.01%      | 8.84%  | 4.15%          | 0.59%  | 0.51%       | 7.12%  | -2.81         | 2.01    | -1.10          | 2.17    | 1.59         | 4.00    |
| H2A1_4_11 K5ac                   | 0.07%      | 0.21%   | 0.05%       | 3.14%  | 0.03%          | 0.25%  | 0.04%       | 0.72%  | 1.64          | 0.86    | 6.10           | 4.89    | -0.58        | 0.68    |
| H2A1_4_11 K9ac                   | 28.53%     | 22.10%  | 9.13%       | 7.59%  | 20.80%         | 9.90%  | 6.53%       | 8.37%  | -0.37         | 0.42    | -0.27          | 0.21    | -1.64        | 1.57    |
| H2A1_4_11 K5acK9ac               | 0.02%      | 0.00%   | 0.00%       | 10.44% | 0.03%          | 0.00%  | 0.00%       | 12.68% | 0.00          | 0.00    | 11.85          | 1.25    | -3.09        | 1.09    |
| H2A1_4_11 K9me1                  | 16.46%     | 0.22%   | 13.86%      | 1.13%  | 6.89%          | 0.18%  | 8.43%       | 0.95%  | -6.24         | 3.29    | -3.61          | 2.29    | -0.25        | 0.35    |
| H2A1_4_11 K5me1                  | 48.59%     | 76.57%  | 57.95%      | 68.86% | 23.72%         | 9.54%  | 1.79%       | 18.41% | 0.66          | 1.99    | 0.25           | 0.88    | 0.25         | 0.56    |
| H2AX_4_11 unmod                  | 5.90%      | 3.88%   | 6.30%       | 9.17%  | 0.69%          | 0.19%  | 1.39%       | 4.79%  | -0.60         | 5.29    | 0.54           | 0.94    | 0.09         | 0.37    |
| H2AX_4_11 K5ac                   | 0.27%      | 0.00%   | 0.17%       | 0.10%  | 0.16%          | 0.00%  | 0.03%       | 0.10%  | 0.00          | 0.00    | -0.83          | 1.19    | -0.66        | 1.01    |
| H2AX_4_11 K9ac                   | 0.12%      | 0.02%   | 0.08%       | 0.05%  | 0.08%          | 0.03%  | 0.02%       | 0.04%  | -2.41         | 1.95    | -0.58          | 1.02    | -0.62        | 0.76    |
| H2AX_4_11 K5acK9ac               | 0.63%      | 8.80%   | 0.93%       | 1.80%  | 0.39%          | 10.28% | 0.19%       | 1.59%  | 3.81          | 1.21    | 0.95           | 0.80    | 0.56         | 1.15    |
| H2AX_4_11 K9me1                  | 69.02%     | 40.24%  | 70.86%      | 54.09% | 1.23%          | 26.76% | 1.13%       | 16.06% | -0.78         | 1.65    | -0.39          | 1.60    | 0.04         | 2.01    |
| H2AX_4_11 K5me1                  | 24.06%     | 47.05%  | 21.66%      | 34.80% | 1.21%          | 17.80% | 1.51%       | 15.15% | 0.97          | 1.98    | 0.68           | 1.32    | -0.15        | 2.30    |
| H2A1_1_11 unmod                  | 50.90%     | 40.55%  | 3.13%       | 9.26%  | 9.77%          | 34.81% | 0.39%       | 3.87%  | -0.33         | 0.43    | 1.56           | 2.39    | -4.02        | 5.23    |
| H2A1_1_11 S1ac                   | 1.46%      | 0.33%   | 0.00%       | 0.50%  | 0.49%          | 0.40%  | 0.00%       | 0.52%  | -2.15         | 3.39    | 0.00           | 0.00    | 0.00         | 0.00    |
| H2A1_1_11 K5ac                   | 47.64%     | 59.12%  | 96.87%      | 90.24% | 9.83%          | 35.20% | 0.39%       | 3.53%  | 0.31          | 0.47    | -0.10          | 2.77    | 1.02         | 5.30    |
| H2AZ_1_19 unmod                  | 91.49%     | 90.96%  | 91.19%      | 90.54% | 1.57%          | 10.99% | 1.08%       | 2.29%  | -0.01         | 0.06    | -0.01          | 0.38    | 0.00         | 0.22    |
| H2AZ_1_19 K4ac                   | 2.59%      | 4.58%   | 3.81%       | 2.79%  | 0.59%          | 5.61%  | 0.15%       | 0.89%  | 0.82          | 0.50    | -0.45          | 2.08    | 0.55         | 3.83    |
| H2AZ_1_19 K7ac                   | 4.95%      | 0.00%   | 2.68%       | 3.95%  | 0.80%          | 0.00%  | 0.44%       | 0.76%  | 0.00          | 0.00    | 0.56           | 2.71    | -0.88        | 4.72    |
| H2AZ_1_19 K11ac                  | 0.31%      | 0.04%   | 1.08%       | 1.43%  | 0.37%          | 0.05%  | 0.19%       | 0.36%  | -2.79         | 1.05    | 0.41           | 1.53    | 1.82         | 3.51    |
| H2AZ_1_19 K15ac                  | 0.01%      | 4.37%   | 0.12%       | 0.34%  | 0.01%          | 5.36%  | 0.05%       | 0.29%  | 8.84          | 1.24    | 1.45           | 1.22    | 3.70         | 4.17    |
| H2AZ_1_19 K4acK7ac               | 0.26%      | 0.00%   | 0.58%       | 0.28%  | 0.17%          | 0.00%  | 0.27%       | 0.18%  | 0.00          | 0.00    | -1.04          | 1.61    | 1.17         | 1.81    |
| H2AZ_1_19 K4acK11ac              | 0.24%      | 0.00%   | 0.01%       | 0.11%  | 0.19%          | 0.00%  | 0.01%       | 0.07%  | 0.00          | 0.00    | 4.38           | 2.34    | -5.45        | 1.81    |
| H2AZ_1_19 K4acK15ac              | 0.02%      | 0.00%   | 0.00%       | 0.00%  | 0.03%          | 0.00%  | 0.00%       | 0.00%  | 0.00          | 0.00    | 0.00           | 0.00    | -2.85        | 1.06    |
| H2AZ_1_19 K7acK11ac              | 0.00%      | 0.00%   | 0.39%       | 0.32%  | 0.00%          | 0.00%  | 0.25%       | 0.17%  | 0.00          | 0.00    | -0.30          | 0.37    | 0.00         | 0.00    |
| H2AZ_1_19 K7acK15ac              | 0.00%      | 0.00%   | 0.00%       | 0.05%  | 0.00%          | 0.00%  | 0.00%       | 0.07%  | 0.00          | 0.00    | 0.00           | 0.00    | 0.00         | 0.00    |
| H2AZ_1_19 K11acK15ac             | 0.07%      | 0.00%   | 0.08%       | 0.09%  | 0.06%          | 0.00%  | 0.03%       | 0.09%  | 0.00          | 0.00    | 0.14           | 0.12    | 0.26         | 0.30    |
| H2AZ_1_19 K4acK7acK15ac          | 0.02%      | 0.00%   | 0.04%       | 0.05%  | 0.03%          | 0.00%  | 0.03%       | 0.06%  | 0.00          | 0.00    | 0.14           | 0.09    | 1.08         | 0.88    |
| H2AZ_1_19 K4acK7acK11ac          | 0.03%      | 0.00%   | 0.02%       | 0.05%  | 0.03%          | 0.00%  | 0.01%       | 0.06%  | 0.00          | 0.00    | 1.66           | 0.89    | -0.62        | 0.40    |
| H2AZ_1_19 K4acK7acK11acK15ac     | 0.03%      | 0.04%   | 0.00%       | 0.00%  | 0.04%          | 0.05%  | 0.00%       | 0.00%  | 0.52          | 0.29    | 0.00           | 0.00    | 0.00         | 0.00    |
| H2A1_12_17 unmod                 | 56.29%     | 62.62%  | 48.09%      | 45.61% | 0.44%          | 0.95%  | 2.58%       | 11.96% | 0.16          | 9.38    | -0.08          | 0.29    | -0.23        | 5.75    |
| H2A1_12_17 K13ac                 | 0.00%      | 0.00%   | 0.02%       | 0.02%  | 0.00%          | 0.00%  | 0.01%       | 0.01%  | 0.00          | 0.00    | 0.15           | 0.21    | 2.62         | 4.88    |
| H2A1_12_17 K15ac                 | 4.10%      | 0.87%   | 18.99%      | 23.61% | 1.29%          | 0.67%  | 6.49%       | 13.29% | -2.24         | 4.24    | 0.31           | 0.47    | 2.21         | 4.29    |
| H2A1_12_17 K15me1                | 38.96%     | 36.18%  | 30.02%      | 26.38% | 0.91%          | 0.31%  | 4.74%       | 4.84%  | -0.11         | 5.39    | -0.19          | 0.87    | -0.38        | 3.54    |
| H2A1_12_17 K13me1                | 0.40%      | 0.00%   | 2.50%       | 3.55%  | 0.21%          | 0.00%  | 0.72%       | 1.20%  | 0.00          | 0.00    | 0.50           | 1.28    | 2.65         | 5.24    |
| H2A1_12_17 T16ac                 | 0.25%      | 0.03%   | 0.37%       | 0.84%  | 0.16%          | 0.04%  | 0.14%       | 0.51%  | -2.86         | 2.53    | 1.16           | 1.53    | 0.56         | 0.94    |
| H2A3_12_17 unmod                 | 5.73%      | 1.27%   | 19.49%      | 23.98% | 1.62%          | 0.94%  | 4.88%       | 12.82% | -2.17         | 4.51    | 0.30           | 0.50    | 1.77         | 5.03    |
| H2A3_12_17 K13ac                 | 0.00%      | 0.00%   | 0.00%       | 0.00%  | 0.00%          | 0.00%  | 0.00%       | 0.00%  | 0.00          | 0.00    | 0.00           | 0.00    | 0.00         | 0.00    |
| H2A3_12_17 K15ac                 | 0.00%      | 0.01%   | 0.00%       | 0.00%  | 0.00%          | 0.02%  | 0.00%       | 0.00%  | 0.00          | 0.00    | 0.00           | 0.00    | 0.00         | 0.00    |
| H2A3_12_17 K15me1                | 14.10%     | 67.20%  | 80.20%      | 44.43% | 2.36%          | 38.23% | 4.96%       | 24.00% | 2.25          | 2.12    | -0.85          | 2.75    | 2.51         | 12.98   |
| H2A3_12_17 K13me1                | 80.18%     | 31.51%  | 0.31%       | 31.59% | 3.97%          | 37.27% | 0.18%       | 36.82% | -1.35         | 2.00    | 6.65           | 1.30    | -7.99        | 9.27    |
| H2A1_72_77 unmod                 | 100.00%    | 100.00% | 99.86%      | 99.99% | 0.00%          | 0.00%  | 0.17%       | 0.01%  | 0.00          | 0.00    | 0.00           | 1.16    | 0.00         | 0.00    |
| H2A1_72_77 K74ac                 | 0.00%      | 0.00%   | 0.14%       | 0.01%  | 0.00%          | 0.00%  | 0.17%       | 0.01%  | 0.00          | 0.00    | -3.98          | 1.16    | 0.00         | 0.00    |
| H2A_1_88 H2A14s.HLQLAIR          | 44.43%     | 43.52%  | 63.99%      | 57.59% | 8.29%          | 12.91% | 2.25%       | 22.37% | -0.03         | 0.08    | -0.15          | 0.40    | 0.53         | 4.34    |
| H2A_1_88 H2AZ.AGGKAGKDSGKAKTAVSR | 53.41%     | 42.63%  | 34.15%      | 40.40% | 7.96%          | 11.92% | 2.02%       | 21.74% | -0.33         | 1.29    | 0.24           | 0.40    | -0.65        | 4.46    |
| H2A_1_88 H2AZ.SAKAGVFPVGR        | 0.91%      | 12.70%  | 0.80%       | 1.19%  | 0.26%          | 4.79%  | 0.22%       | 0.45%  | 3.80          | 3.40    | 0.58           | 1.35    | -0.19        | 0.51    |
| H2A_1_88 H2AX.GKTGGKAR           | 1.24%      | 1.15%   | 1.05%       | 0.82%  | 0.28%          | 0.35%  | 0.12%       | 0.33%  | -0.12         | 0.31    | -0.35          | 1.09    | -0.24        | 1.06    |

**Table S3.** Effects of MGL50 on PTMs of H2B histone variant in Hs27 and HT-29 cells. Cells were seeded (2.5x10<sup>5</sup> cells/well) into 12-well plates, were treated with 0.03 mg/mL MGL (MGL50) for 48 h and then were collected. Histones were extracted and peptides were analyzed by mass spectrometry. Data are represented as mean and standard error. NT, non-treated; MGL50, concentration of MGL able to reduce cell viability to 50%. Heteroscedastic two-tails t-test are applied and statistical analysis was carried out comparing Hs27 treated vs not treated, HT-29 treated vs not treated, HT-29 non treated vs Hs27 non treated. p-value are reported as -log2. Statistically significant differences are highlighted in green.

|                                           | mean       |         |             |        | standard error |        |             |        |               |         |                |         | p-value | HT-29 MGL50/NT | p-value | HT29/Hs27 NT | p-value |
|-------------------------------------------|------------|---------|-------------|--------|----------------|--------|-------------|--------|---------------|---------|----------------|---------|---------|----------------|---------|--------------|---------|
|                                           | Hs27 cells |         | HT-29 cells |        | Hs27 cells     |        | HT-29 cells |        | Hs27 MGL50/NT | p-value | HT-29 MGL50/NT | p-value |         |                |         |              |         |
|                                           | NT         | MGL50   | NT          | MGL50  | NT             | MGL50  | NT          | MGL50  |               |         |                |         |         |                |         |              |         |
| H2B1B_80_86 unmod                         | 99.87%     | 100.00% | 99.33%      | 98.54% | 0.16%          | 0.00%  | 0.82%       | 1.59%  | 0.00          | 0.00    | -0.01          | 0.69    | -0.01   | 1.07           |         |              |         |
| H2B1B_80_86 Y83ac                         | 0.13%      | 0.00%   | 0.67%       | 1.46%  | 0.16%          | 0.00%  | 0.82%       | 1.59%  | 0.00          | 0.00    | 1.12           | 0.69    | 2.33    | 1.07           |         |              |         |
| H2B1A_81_87 unmod                         | 26.09%     | 8.13%   | 3.32%       | 2.42%  | 16.10%         | 9.96%  | 4.06%       | 2.96%  | -1.68         | 1.69    | -0.46          | 0.26    | -2.98   | 2.57           |         |              |         |
| H2B1A_81_87 K86ac                         | 73.91%     | 25.20%  | 96.68%      | 97.58% | 16.10%         | 30.87% | 4.06%       | 2.96%  | -1.55         | 2.63    | 0.01           | 0.26    | 0.39    | 2.57           |         |              |         |
| H2B_1_29 1C.PEPAKSAPAPKKGSKKAVTKAQKKDGKKR | 62.08%     | 75.39%  | 46.65%      | 42.48% | 1.31%          | 5.89%  | 5.79%       | 7.06%  | 0.28          | 4.21    | -0.14          | 0.72    | -0.41   | 4.91           |         |              |         |
| H2B_1_29 1H.PDPAKSAPAPKKGSKKAVTKAQKKDGKKR | 11.11%     | 8.18%   | 5.20%       | 16.68% | 0.84%          | 2.83%  | 1.20%       | 10.04% | -0.44         | 1.78    | 1.68           | 1.76    | -1.10   | 7.01           |         |              |         |
| H2B_1_29 2F.PDPAKSAPAPKKGSKKAVTKVQKKDGKKR | 2.05%      | 0.00%   | 1.12%       | 3.62%  | 2.30%          | 0.00%  | 1.08%       | 3.60%  | 0.00          | 0.00    | 1.70           | 1.12    | -0.88   | 0.57           |         |              |         |
| H2B_1_29 1B.PEPSKSAPAPKKGSKKAITKAQKKDGKKR | 2.25%      | 0.00%   | 0.08%       | 0.00%  | 2.76%          | 0.00%  | 0.09%       | 0.00%  | 0.00          | 0.00    | 0.00           | 0.00    | -4.86   | 1.20           |         |              |         |
| H2B_1_29 1N.PEPSKSAPAPKKGSKKAVTKAQKKDGKKR | 16.96%     | 1.68%   | 40.77%      | 23.37% | 7.80%          | 1.06%  | 8.77%       | 17.52% | -3.34         | 2.88    | -0.80          | 1.56    | 1.27    | 3.88           |         |              |         |
| H2B_1_29 1D.PEPTKSAPAPKKGSKKAVTKAQKKDGKKR | 5.54%      | 3.95%   | 4.04%       | 6.89%  | 0.88%          | 2.62%  | 4.95%       | 4.79%  | -0.49         | 0.95    | 0.77           | 0.65    | -0.46   | 0.45           |         |              |         |
| H2B_1_29 1M.PEPVKSAPVPKKGSKKAINKAQKKDGKKR | 0.00%      | 0.00%   | 1.46%       | 0.68%  | 0.00%          | 0.00%  | 1.79%       | 0.52%  | 0.00          | 0.00    | -1.11          | 0.66    | 0.00    | 0.00           |         |              |         |
| H2B_1_29 1L.PELAKSAPAPKKGSKKAVTKAQKKDGKKR | 0.00%      | 10.81%  | 0.68%       | 6.27%  | 0.00%          | 4.12%  | 0.84%       | 7.69%  | 0.00          | 0.00    | 3.20           | 1.10    | 0.00    | 0.00           |         |              |         |

**Table S4.** Effects of MGL50 on PTMs of H3.3 histone variant in Hs27 and HT-29 cells. Cells were seeded ( $2.5 \times 10^5$  cells/well) into 12-well plates, were treated with 0.03 mg/mL MGL (MGL50) for 48 h and then were collected. Histones were extracted and peptides were analyzed by mass spectrometry. Data are represented as mean and standard error. NT, non-treated; MGL50, concentration of MGL able to reduce cell viability to 50%. Heteroscedastic two-tails t-test are applied and statistical analysis was carried out comparing Hs27 treated vs not treated, HT-29 treated vs not treat,; HT-29 non treated vs Hs27 non treated. p-value are reported as  $-\log_2$ . Statistically significant differences are highlighted in green.

|                        | mean       |        |             |        | standard error |       |             |       | Hs27 MGL50/NT | p-value | HT-29 MGL50/NT | p-value | HT29/Hs27 NT | p-value |
|------------------------|------------|--------|-------------|--------|----------------|-------|-------------|-------|---------------|---------|----------------|---------|--------------|---------|
|                        | Hs27 cells |        | HT-29 cells |        | Hs27 cells     |       | HT-29 cells |       |               |         |                |         |              |         |
|                        | NT         | MGL50  | NT          | MGL50  | NT             | MGL50 | NT          | MGL50 |               |         |                |         |              |         |
| H33_27_40 unmod        | 0.55%      | 4.12%  | 0.22%       | 6.04%  | 0.67%          | 5.05% | 0.23%       | 3.96% | 2.91          | 1.06    | 4.80           | 2.23    | -1.34        | 0.75    |
| H33_27_40 K36me1       | 0.20%      | 0.00%  | 0.00%       | 0.36%  | 0.25%          | 0.00% | 0.00%       | 0.44% | 0.00          | 0.00    | 0.00           | 0.00    | 0.00         | 0.00    |
| H33_27_40 K27me1       | 0.18%      | 0.00%  | 0.00%       | 1.08%  | 0.22%          | 0.00% | 0.00%       | 1.17% | 0.00          | 0.00    | 0.00           | 0.00    | 0.00         | 0.00    |
| H33_27_40 K27me2       | 4.87%      | 1.19%  | 13.33%      | 13.36% | 3.20%          | 1.46% | 2.12%       | 5.22% | -2.03         | 1.89    | 0.00           | 0.01    | 1.45         | 4.21    |
| H33_27_40 K36me2       | 7.76%      | 4.22%  | 3.98%       | 3.63%  | 3.05%          | 5.17% | 1.22%       | 2.23% | -0.88         | 0.97    | -0.13          | 0.19    | -0.96        | 2.12    |
| H33_27_40 K27me3       | 0.74%      | 0.00%  | 5.17%       | 5.67%  | 0.91%          | 0.00% | 0.88%       | 2.47% | 0.00          | 0.00    | 0.13           | 0.27    | 2.80         | 6.28    |
| H33_27_40 K36me3       | 4.09%      | 2.15%  | 1.08%       | 0.80%  | 0.92%          | 2.63% | 0.23%       | 0.17% | -0.93         | 1.18    | -0.44          | 1.74    | -1.92        | 5.83    |
| H33_27_40 K27me2K36me1 | 9.19%      | 4.03%  | 9.55%       | 8.98%  | 3.12%          | 4.93% | 1.62%       | 4.05% | -1.19         | 1.56    | -0.09          | 0.18    | 0.06         | 0.14    |
| H33_27_40 K27me1K36me2 | 13.23%     | 10.60% | 5.41%       | 5.85%  | 2.30%          | 9.26% | 0.92%       | 1.69% | -0.32         | 0.41    | 0.11           | 0.33    | -1.29        | 5.79    |
| H33_27_40 K27me1K36me1 | 2.16%      | 0.33%  | 0.02%       | 0.44%  | 1.98%          | 0.40% | 0.02%       | 0.23% | -2.74         | 1.61    | 4.56           | 2.77    | -6.85        | 1.66    |
| H33_27_40 K27me3K36me1 | 0.00%      | 0.00%  | 1.10%       | 1.67%  | 0.00%          | 0.00% | 0.68%       | 1.03% | 0.00          | 0.00    | 0.60           | 0.73    | 0.00         | 0.00    |
| H33_27_40 K27me1K36me3 | 4.62%      | 1.36%  | 1.57%       | 2.93%  | 0.90%          | 1.66% | 1.07%       | 2.37% | -1.77         | 3.29    | 0.90           | 0.84    | -1.56        | 4.17    |
| H33_27_40 K27me2K36me3 | 11.72%     | 7.53%  | 12.45%      | 14.86% | 2.24%          | 9.22% | 1.47%       | 6.88% | -0.64         | 0.70    | 0.26           | 0.52    | 0.09         | 0.41    |
| H33_27_40 K27me3K36me2 | 2.19%      | 0.00%  | 2.80%       | 2.85%  | 0.98%          | 0.00% | 0.65%       | 1.77% | 0.00          | 0.00    | 0.02           | 0.03    | 0.35         | 0.84    |

**Table S5.** Effects of MGL50 on PTMs of H1 histone variant in HT-29 cells. Cells were seeded ( $2.5 \times 10^5$  cells/well) into 12-well plates, were treated with 0.03 mg/mL MGL (MGL50) for 24, 48 and 72 h and then were collected. Histones were extracted and peptides were analyzed by mass spectrometry. Data are represented as mean and standard deviation. NT, non-treated; PLP, control vehicle, cells treated with 0.5 mM PLP in PBS; MGL50, concentration of MGL able to reduce cell viability to 50%. Heteroscedastic two-tails t-test are applied and statistical analysis was carried out comparing, at each incubation time, NT vs PLP and PLP vs MGL. \*=  $p \leq 0.05$ ; \*\*=  $p \leq 0.01$  and \*\*\*=  $p \leq 0.001$ . Statistically significant differences are highlighted in green.

| H1 variant                                | mean   |        |        |         |         |         |           |           |           | standard deviation |        |        |         |         |         |           |           |           | NT vs PLP |      |       |       | PLP vs MGL |       |  |  |
|-------------------------------------------|--------|--------|--------|---------|---------|---------|-----------|-----------|-----------|--------------------|--------|--------|---------|---------|---------|-----------|-----------|-----------|-----------|------|-------|-------|------------|-------|--|--|
|                                           | NT 24h | NT 48h | NT 72h | PLP 24h | PLP 48h | PLP 72h | MGL50 24h | MGL50 48h | MGL50 72h | NT 24h             | NT 48h | NT 72h | PLP 24h | PLP 48h | PLP 72h | MGL50 24h | MGL50 48h | MGL50 72h | 24h       | 48h  | 72h   | 24h   | 48h        | 72h   |  |  |
| H14_25_32 unmod                           | 82.64% | 77.81% | 81.52% | 77.77%  | 76.57%  | 84.73%  | 71.90%    | 84.71%    | 83.37%    | 0.05               | 0.06   | 0.02   | 0.14    | 0.19    | 0.02    | 0.11      | 0.01      | 0.02      | 0.00      | 0.92 | 0.42  | 0.613 | 0.525      | 0.440 |  |  |
| H14_25_32 K25me1                          | 4.83%  | 9.69%  | 1.75%  | 8.78%   | 12.17%  | 1.70%   | 14.75%    | 2.31%     | 5.31%     | 0.06               | 0.08   | 0.01   | 0.13    | 0.18    | 0.00    | 0.12      | 0.00      | 0.03      | 0.65      | 0.84 | 0.87  | 0.579 | 0.444      | 0.143 |  |  |
| H14_25_32 K25me2                          | 0.60%  | 0.80%  | 0.15%  | 0.65%   | 0.63%   | 0.31%   | 0.43%     | 0.20%     | 0.05%     | 0.00               | 0.00   | 0.00   | 0.01    | 0.00    | 0.00    | 0.00      | 0.00      | 0.00      | 0.88      | 0.54 | 0.23  | 0.521 | 0.015      | 0.069 |  |  |
| H14_25_32 K25me3                          | 0.00%  | 0.00%  | 0.00%  | 0.00%   | 0.00%   | 0.00%   | 0.00%     | 0.00%     | 0.00%     | 0.00               | 0.00   | 0.00   | 0.00    | 0.00    | 0.00    | 0.00      | 0.00      | 0.00      | 1.00      | 1.00 | 1.00  | 1.000 | 1.000      | 1.000 |  |  |
| H14_25_32 K25ac                           | 0.75%  | 0.92%  | 1.05%  | 0.45%   | 0.84%   | 0.83%   | 0.89%     | 0.02%     | 0.66%     | 0.00               | 0.01   | 0.01   | 0.01    | 0.01    | 0.01    | 0.00      | 0.01      | 0.52      | 0.91      | 0.77 | 0.458 | 0.203 | 0.787      |       |  |  |
| H14_25_33 K33ac                           | 8.46%  | 7.58%  | 7.70%  | 6.21%   | 6.34%   | 10.49%  | 7.91%     | 10.52%    | 8.74%     | 0.01               | 0.03   | 0.02   | 0.02    | 0.02    | 0.00    | 0.01      | 0.01      | 0.16      | 0.59      | 0.04 | 0.305 | 0.030 | 0.038      |       |  |  |
| H14_25_33 S26ac                           | 1.83%  | 1.07%  | 2.26%  | 3.55%   | 1.87%   | 0.82%   | 1.46%     | 0.78%     | 0.53%     | 0.01               | 0.00   | 0.01   | 0.01    | 0.00    | 0.00    | 0.00      | 0.00      | 0.20      | 0.05      | 0.10 | 0.127 | 0.024 | 0.369      |       |  |  |
| H14_25_33 S26ph                           | 0.90%  | 2.12%  | 3.57%  | 2.69%   | 1.59%   | 1.12%   | 2.66%     | 1.41%     | 1.48%     | 0.00               | 0.00   | 0.01   | 0.01    | 0.00    | 0.01    | 0.01      | 0.01      | 0.01      | 0.06      | 0.23 | 0.05  | 0.965 | 0.591      | 0.576 |  |  |
| H12_33_53 unmod                           | 68.60% | 72.96% | 70.05% | 69.05%  | 67.57%  | 67.78%  | 71.37%    | 58.49%    | 58.42%    | 0.04               | 0.06   | 0.03   | 0.03    | 0.11    | 0.02    | 0.03      | 0.50      | 0.10      | 0.31      | 0.21 | 0.31  | 0.050 | 0.847      | 0.170 |  |  |
| H12_33_53 K33me1                          | 29.49% | 25.66% | 29.32% | 30.20%  | 34.43%  | 31.56%  | 25.66%    | 8.90%     | 19.49%    | 0.02               | 0.04   | 0.02   | 0.04    | 0.08    | 0.01    | 0.05      | 0.13      | 0.14      | 0.78      | 0.16 | 0.24  | 0.286 | 0.940      | 0.282 |  |  |
| H12_33_53 K33me2                          | 0.03%  | 0.28%  | 0.35%  | 0.48%   | 1.19%   | 0.40%   | 2.21%     | 0.52%     | 0.66%     | 0.00               | 0.00   | 0.00   | 0.01    | 0.00    | 0.01    | 0.04      | 0.00      | 0.01      | 0.25      | 0.21 | 0.92  | 0.494 | 0.330      | 0.744 |  |  |
| H12_33_53 K33me3                          | 1.06%  | 0.22%  | 0.15%  | 2.59%   | 0.13%   | 0.01%   | 0.05%     | 15.87%    | 16.20%    | 0.01               | 0.00   | 0.00   | 0.03    | 0.00    | 0.00    | 0.00      | 0.27      | 0.14      | 0.50      | 0.65 | 0.19  | 0.314 | 0.426      | 0.183 |  |  |
| H12_33_53 K33ac                           | 0.45%  | 0.87%  | 0.12%  | 0.00%   | 0.84%   | 0.25%   | 0.36%     | 18.22%    | 2.72%     | 0.01               | 0.01   | 0.00   | 0.00    | 0.01    | 0.00    | 0.00      | 0.30      | 0.05      | 1.00      | 0.98 | 0.41  | 1.000 | 0.416      | 0.459 |  |  |
| H12_33_53 S46ac                           | 0.38%  | 0.02%  | 0.01%  | 1.69%   | 0.83%   | 0.00%   | 0.36%     | 0.00%     | 2.52%     | 0.01               | 0.00   | 0.00   | 0.02    | 0.01    | 0.00    | 0.00      | 0.04      | 0.24      | 0.43      | 0.68 | 0.218 | 1.000 | 0.423      |       |  |  |
| H15_36_56 unmod                           | 27.07% | 25.46% | 28.98% | 27.76%  | 26.49%  | 31.59%  | 23.26%    | 7.67%     | 19.29%    | 0.02               | 0.05   | 0.02   | 0.01    | 0.03    | 0.02    | 0.04      | 0.11      | 0.13      | 0.66      | 0.78 | 0.19  | 0.141 | 0.044      | 0.232 |  |  |
| H15_36_56 K36me1                          | 0.02%  | 0.00%  | 0.14%  | 0.00%   | 1.46%   | 0.03%   | 0.00%     | 1.21%     | 0.00%     | 0.00               | 0.00   | 0.00   | 0.00    | 0.02    | 0.00    | 0.00      | 0.02      | 0.00      | 1.00      | 1.00 | 0.45  | 1.000 | 0.888      | 1.000 |  |  |
| H15_36_56 K36me2                          | 0.21%  | 0.22%  | 0.15%  | 1.97%   | 0.18%   | 0.01%   | 0.42%     | 33.33%    | 17.39%    | 0.00               | 0.00   | 0.00   | 0.03    | 0.00    | 0.00    | 0.01      | 0.58      | 0.15      | 0.47      | 0.86 | 0.24  | 0.485 | 0.425      | 0.175 |  |  |
| H15_36_56 K36me3                          | 0.92%  | 1.52%  | 0.70%  | 1.92%   | 0.89%   | 0.06%   | 6.25%     | 0.96%     | 0.00%     | 0.01               | 0.02   | 0.01   | 0.02    | 0.02    | 0.00    | 0.05      | 0.02      | 0.00      | 0.42      | 0.71 | 0.19  | 0.222 | 0.960      | 1.000 |  |  |
| H15_36_56 K36ac                           | 67.16% | 72.33% | 69.34% | 67.94%  | 67.47%  | 67.32%  | 70.17%    | 58.41%    | 59.02%    | 0.03               | 0.03   | 0.03   | 0.02    | 0.05    | 0.02    | 0.03      | 0.49      | 0.05      | 0.72      | 0.47 | 0.48  | 0.366 | 0.697      | 0.046 |  |  |
| H15_36_56 S43ac                           | 4.61%  | 0.44%  | 0.78%  | 0.41%   | 1.51%   | 0.48%   | 0.00%     | 0.20%     | 4.30%     | 0.04               | 0.01   | 0.01   | 0.00    | 0.02    | 0.00    | 0.00      | 0.00      | 0.07      | 0.20      | 0.43 | 0.65  | 1.000 | 0.326      | 0.468 |  |  |
| H1_1_35 H12.SETAPAAPAAPPAEKAPVKKKKAAKKAA  | 0.72%  | 10.96% | 0.17%  | 1.10%   | 1.39%   | 0.00%   | 11.98%    | 0.00%     | 1.81%     | 0.00               | 0.14   | 0.00   | 0.02    | 0.02    | 0.00    | 0.11      | 0.00      | 0.03      | 0.76      | 0.31 | 1.00  | 0.163 | 1.000      | 1.000 |  |  |
| H1_1_35 H13.SETAPLAPTIPAPAEKTPVKKKKAKAGAT | 29.11% | 29.08% | 5.37%  | 20.55%  | 1.42%   | 1.75%   | 11.93%    | 30.57%    | 34.79%    | 0.39               | 0.48   | 0.07   | 0.28    | 0.01    | 0.03    | 0.21      | 0.34      | 0.22      | 0.77      | 0.43 | 0.46  | 0.691 | 0.276      | 0.115 |  |  |
| H1_1_35 H14.SETAPAAPAAPAPAEKTPVKKKKAR     | 55.20% | 19.08% | 21.21% | 38.22%  | 58.80%  | 14.77%  | 22.79%    | 34.98%    | 29.11%    | 0.48               | 0.33   | 0.22   | 0.50    | 0.48    | 0.26    | 0.39      | 0.48      | 0.50      | 0.94      | 0.23 | 0.76  | 0.392 | 0.777      | 0.683 |  |  |
| H1_1_35 H15.SETAPATATATAPAEKTPAAKKATTKAAJ | 14.98% | 40.88% | 73.25% | 20.12%  | 30.40%  | 83.58%  | 31.30%    | 14.50%    | 34.30%    | 0.12               | 0.44   | 0.34   | 0.24    | 0.51    | 0.24    | 0.45      | 0.16      | 0.31      | 0.75      | 0.80 | 0.63  | 0.320 | 0.633      | 0.084 |  |  |
| H1_54_81 H11.GVSLAALKKALAAAGDYVEKNNSR     | 3.64%  | 25.27% | 10.36% | 0.00%   | 4.46%   | 0.22%   | 17.61%    | 33.82%    | 69.96%    | 0.06               | 0.43   | 0.18   | 0.00    | 0.07    | 0.00    | 0.31      | 0.48      | 0.33      | 1.00      | 0.49 | 0.43  | 1.000 | 0.215      | 0.084 |  |  |
| H1_54_81 H1234.SGVSLAALKKALAAAGDYVEKNNSR  | 58.46% | 44.85% | 60.62% | 61.80%  | 69.33%  | 60.83%  | 59.05%    | 38.49%    | 29.02%    | 0.04               | 0.28   | 0.20   | 0.18    | 0.16    | 0.10    | 0.13      | 0.53      | 0.17      | 0.77      | 0.25 | 0.99  | 0.842 | 0.382      | 0.049 |  |  |
| H1_54_81 H15.NGLSLAALKKALAAAGDYVEKNNSR    | 37.83% | 29.64% | 28.97% | 37.99%  | 24.56%  | 38.54%  | 22.80%    | 7.69%     | 10.02%    | 0.04               | 0.16   | 0.02   | 0.18    | 0.13    | 0.11    | 0.17      | 0.13      | 0.17      | 0.99      | 0.69 | 0.20  | 0.343 | 0.196      | 0.072 |  |  |
| H1_54_81 H17.VGMSLVALKKALAAAGDYVEKNNSR    | 0.07%  | 0.23%  | 0.04%  | 0.22%   | 1.05%   | 0.41%   | 0.54%     | 0.00%     | 0.00%     | 0.00               | 0.00   | 0.00   | 0.00    | 0.02    | 0.01    | 0.01      | 0.00      | 0.00      | 0.35      | 0.44 | 0.34  | 0.592 | 1.000      | 1.000 |  |  |

**Table S6.** Effects of MGL50 on PTMs of H2A histone variant in HT-29 cells. Cells were seeded ( $2.5 \times 10^5$  cells/well) into 12-well plates, were treated with 0.03 mg/mL MGL (MGL50) for 24, 48 and 72 h and then were collected. Histones were extracted and peptides were analyzed by mass spectrometry. Data are represented as mean and standard deviation. NT, non-treated; PLP, control vehicle, cells treated with 0.5 mM PLP in PBS; MGL50, concentration of MGL able to reduce cell viability to 50%. Heteroscedastic two-tails t-test are applied and statistical analysis was carried out comparing, at each incubation time, NT vs PLP and PLP vs MGL. \* =  $p \leq 0.05$ ; \*\* =  $p \leq 0.01$  and \*\*\* =  $p \leq 0.001$ . Statistically significant differences are highlighted in green.

| H2A variant            | mean   |        |        |         |         |         |           |           |           |        | standard deviation |        |         |         |         |           |           |           |      |      | NT vs PUP |       |       |       | PUP vs MZL |      |      |      |
|------------------------|--------|--------|--------|---------|---------|---------|-----------|-----------|-----------|--------|--------------------|--------|---------|---------|---------|-----------|-----------|-----------|------|------|-----------|-------|-------|-------|------------|------|------|------|
|                        | NT 24h | NT 48h | NT 72h | PUP 24h | PUP 48h | PUP 72h | MG150 24h | MG150 48h | MG150 72h | NT 24h | NT 48h             | NT 72h | PUP 24h | PUP 48h | PUP 72h | MG150 24h | MG150 48h | MG150 72h | 24h  | 48h  | 72h       | 24h   | 48h   | 72h   | 24h        | 48h  | 72h  |      |
| H2A1_36_42 unmod       | 99.87% | 99.81% | 99.91% | 99.91%  | 99.94%  | 99.92%  | 99.88%    | 99.83%    | 99.84%    | 0.00   | 0.00               | 0.00   | 0.00    | 0.00    | 0.00    | 0.00      | 0.00      | 0.00      | 0.15 | 0.65 | 0.76      | 0.246 | 0.880 | 0.053 | 0.00       | 0.00 | 0.00 |      |
| H2A1_36_42 K36ac       | 0.12%  | 0.16%  | 0.05%  | 0.09%   | 0.14%   | 0.07%   | 0.10%     | 0.13%     | 0.16%     | 0.00   | 0.00               | 0.00   | 0.00    | 0.00    | 0.00    | 0.00      | 0.00      | 0.00      | 0.16 | 0.76 | 0.21      | 0.579 | 0.853 | 0.038 | 0.00       | 0.00 | 0.00 |      |
| H2A1_36_42 Y93ac       | 0.00%  | 0.00%  | 0.03%  | 0.05%   | 0.00%   | 0.02%   | 0.01%     | 0.02%     | 0.03%     | 0.00   | 0.00               | 0.00   | 0.00    | 0.00    | 0.00    | 0.00      | 0.00      | 0.00      | 0.10 | 0.71 | 0.10      | 0.500 | 0.100 | 0.251 | 1.000      | 0.00 | 0.00 |      |
| H2A1_36_42 K36ac       | 99.97% | 99.28% | 99.69% | 99.69%  | 99.69%  | 99.86%  | 99.86%    | 99.82%    | 99.82%    | 0.00   | 0.00               | 0.00   | 0.00    | 0.00    | 0.00    | 0.00      | 0.00      | 0.00      | 0.01 | 0.30 | 0.71      | 0.334 | 0.788 | 0.020 | 0.222      | 0.00 | 0.00 |      |
| H2A1_36_42 K36ac       | 0.02%  | 0.00%  | 0.00%  | 0.00%   | 0.01%   | 0.00%   | 0.00%     | 0.00%     | 0.01%     | 0.00   | 0.00               | 0.00   | 0.00    | 0.00    | 0.00    | 0.00      | 0.00      | 0.00      | 0.52 | 0.83 | 1.00      | 0.482 | 0.100 | 0.000 | 0.000      | 0.00 | 0.00 |      |
| H2A1_36_42 Y93ac       | 0.02%  | 0.06%  | 0.31%  | 0.41%   | 0.89%   | 0.14%   | 0.50%     | 0.80%     | 0.67%     | 0.00   | 0.00               | 0.00   | 0.01    | 0.01    | 0.00    | 0.00      | 0.00      | 0.01      | 0.14 | 0.68 | 0.34      | 0.779 | 0.868 | 0.034 | 0.191      | 0.00 | 0.00 |      |
| H2A1_36_42 unmod       | 99.92% | 99.26% | 99.97% | 99.81%  | 99.63%  | 99.91%  | 99.81%    | 99.72%    | 99.52%    | 0.00   | 0.00               | 0.00   | 0.02    | 0.00    | 0.00    | 0.01      | 0.01      | 0.00      | 0.37 | 0.15 | 0.50      | 0.872 | 0.864 | 0.505 | 0.00       | 0.00 | 0.00 |      |
| H2A1_36_42 K36ac       | 0.02%  | 0.11%  | 0.00%  | 0.02%   | 0.11%   | 0.00%   | 0.00%     | 0.13%     | 0.48%     | 0.00   | 0.00               | 0.00   | 0.00    | 0.00    | 0.00    | 0.00      | 0.00      | 0.01      | 0.80 | 0.98 | 0.47      | 0.847 | 0.885 | 1.000 | 0.00       | 0.00 | 0.00 |      |
| H2A1_36_42 Y93ac       | 0.00%  | 0.63%  | 0.03%  | 1.17%   | 0.26%   | 0.09%   | 1.39%     | 0.15%     | 0.00%     | 0.00   | 0.00               | 0.00   | 0.00    | 0.00    | 0.00    | 0.00      | 0.00      | 0.00      | 0.37 | 0.07 | 0.47      | 0.884 | 0.588 | 1.000 | 0.00       | 0.00 | 0.00 |      |
| H2A1_11 unmod          | 99.94% | 80.65% | 87.24% | 86.64%  | 87.24%  | 99.83%  | 99.83%    | 99.83%    | 99.83%    | 0.00   | 0.00               | 0.00   | 0.00    | 0.00    | 0.00    | 0.00      | 0.00      | 0.00      | 0.00 | 0.00 | 0.00      | 0.00  | 0.00  | 0.00  | 0.00       | 0.00 | 0.00 |      |
| H2A1_4_11 K5ac         | 2.41%  | 1.00%  | 1.99%  | 0.98%   | 2.00%   | 3.29%   | 2.47%     | 1.74%     | 2.06%     | 0.02   | 0.02               | 0.02   | 0.02    | 0.02    | 0.00    | 0.00      | 0.00      | 0.02      | 0.02 | 0.41 | 0.52      | 0.34  | 0.210 | 0.853 | 0.360      | 0.00 | 0.00 |      |
| H2A1_4_11 K9ac         | 1.60%  | 2.61%  | 1.34%  | 2.99%   | 1.56%   | 0.48%   | 1.83%     | 1.23%     | 1.20%     | 0.02   | 0.02               | 0.02   | 0.02    | 0.02    | 0.00    | 0.00      | 0.02      | 0.01      | 0.63 | 0.51 | 0.43      | 0.223 | 0.813 | 0.491 | 0.00       | 0.00 | 0.00 |      |
| H2A1_4_11 K5acK9ac     | 0.09%  | 0.17%  | 0.06%  | 0.10%   | 0.14%   | 0.13%   | 0.15%     | 0.26%     | 0.05%     | 0.00   | 0.00               | 0.00   | 0.00    | 0.00    | 0.00    | 0.00      | 0.00      | 0.00      | 0.89 | 0.68 | 0.39      | 0.443 | 0.154 | 0.343 | 0.00       | 0.00 | 0.00 |      |
| H2A1_4_11 K9me1        | 0.04%  | 2.71%  | 3.73%  | 2.08%   | 2.25%   | 1.17%   | 1.80%     | 0.44%     | 0.49%     | 0.00   | 0.01               | 0.04   | 0.01    | 0.02    | 0.01    | 0.02      | 0.00      | 0.00      | 0.05 | 0.76 | 0.33      | 0.842 | 0.195 | 0.252 | 0.00       | 0.00 | 0.00 |      |
| H2A1_4_11 K5me1        | 2.44%  | 4.47%  | 5.63%  | 5.02%   | 4.17%   | 1.97%   | 2.87%     | 0.91%     | 0.98%     | 0.00   | 0.02               | 0.02   | 0.02    | 0.01    | 0.01    | 0.02      | 0.01      | 0.00      | 0.84 | 0.08 | 0.287     | 0.023 | 0.157 | 0.00  | 0.00       | 0.00 |      |      |
| H2A1_11 unmod          | 11.62% | 16.07% | 12.27% | 14.65%  | 11.61%  | 14.65%  | 11.61%    | 14.65%    | 11.61%    | 0.00   | 0.04               | 0.11   | 0.08    | 0.13    | 0.00    | 0.00      | 0.00      | 0.00      | 0.30 | 0.81 | 0.40      | 0.565 | 0.177 | 0.00  | 0.00       | 0.00 | 0.00 |      |
| H2A1_4_11 K5ac         | 0.00%  | 0.01%  | 0.00%  | 0.00%   | 0.04%   | 0.01%   | 0.01%     | 0.01%     | 0.00%     | 0.00   | 0.00               | 0.00   | 0.00    | 0.00    | 0.00    | 0.00      | 0.00      | 0.00      | 1.00 | 0.42 | 1.00      | 1.000 | 1.000 | 1.000 | 0.00       | 0.00 | 0.00 |      |
| H2A1_4_11 K9ac         | 1.81%  | 4.16%  | 3.30%  | 3.71%   | 2.54%   | 1.83%   | 2.32%     | 1.02%     | 0.21%     | 0.00   | 0.01               | 0.01   | 0.01    | 0.01    | 0.00    | 0.00      | 0.00      | 0.00      | 0.03 | 0.27 | 0.17      | 0.890 | 0.294 | 0.068 | 0.00       | 0.00 | 0.00 |      |
| H2A1_4_11 K5acK9ac     | 0.15%  | 53.72% | 37.13% | 59.24%  | 47.93%  | 57.24%  | 47.57%    | 56.63%    | 57.81%    | 0.03   | 0.09               | 0.16   | 0.13    | 0.13    | 0.11    | 0.06      | 0.07      | 0.50      | 0.32 | 0.56 | 0.14      | 0.772 | 0.036 | 0.986 | 0.00       | 0.00 | 0.00 |      |
| H2A1_4_11 K9me1        | 4.74%  | 9.72%  | 5.44%  | 6.47%   | 1.63%   | 5.89%   | 1.42%     | 0.03%     | 0.04%     | 0.08   | 0.08               | 0.07   | 0.03    | 0.03    | 0.02    | 0.00      | 0.00      | 0.00      | 0.74 | 0.16 | 0.92      | 0.070 | 0.423 | 0.031 | 0.00       | 0.00 | 0.00 |      |
| H2A1_4_11 K5me1        | 22.47% | 36.32% | 33.43% | 24.93%  | 30.67%  | 21.26%  | 28.15%    | 33.46%    | 33.46%    | 0.00   | 0.04               | 0.11   | 0.08    | 0.13    | 0.00    | 0.00      | 0.00      | 0.00      | 0.46 | 0.75 | 0.05      | 0.275 | 0.086 | 0.617 | 0.00       | 0.00 | 0.00 |      |
| H2A1_11 unmod          | 9.97%  | 9.60%  | 40.93% | 8.49%   | 40.93%  | 11.32%  | 10.79%    | 10.93%    | 10.11%    | 0.00   | 0.00               | 0.00   | 0.00    | 0.00    | 0.00    | 0.00      | 0.00      | 0.00      | 0.20 | 0.79 | 0.00      | 0.051 | 0.000 | 0.179 | 0.00       | 0.00 | 0.00 |      |
| H2A1_4_11 K5ac         | 0.16%  | 0.41%  | 1.82%  | 0.34%   | 0.24%   | 0.43%   | 0.24%     | 0.32%     | 0.17%     | 0.00   | 0.00               | 0.01   | 0.00    | 0.00    | 0.00    | 0.00      | 0.00      | 0.00      | 0.02 | 0.05 | 0.22      | 0.193 | 0.271 | 0.169 | 0.00       | 0.00 | 0.00 |      |
| H2A1_4_11 K9ac         | 0.47%  | 0.75%  | 2.35%  | 0.53%   | 0.50%   | 0.56%   | 0.75%     | 0.75%     | 0.29%     | 0.00   | 0.00               | 0.00   | 0.01    | 0.00    | 0.00    | 0.00      | 0.00      | 0.00      | 0.84 | 0.52 | 0.03937   | 0.412 | 0.542 | 0.247 | 0.00       | 0.00 | 0.00 |      |
| H2A1_4_11 K5acK9ac     | 0.00%  | 0.25%  | 0.58%  | 0.07%   | 0.09%   | 0.05%   | 0.08%     | 0.05%     | 0.01%     | 0.00   | 0.00               | 0.00   | 0.00    | 0.00    | 0.00    | 0.00      | 0.00      | 0.00      | 0.63 | 0.21 | 0.03890   | 0.868 | 0.206 | 0.070 | 0.00       | 0.00 | 0.00 |      |
| H2A1_4_11 K9me1        | 42.37% | 43.93% | 37.99% | 63.37%  | 63.82%  | 68.41%  | 0.09%     | 39.40%    | 40.06%    | 0.37   | 0.36               | 0.14   | 0.02    | 0.02    | 0.10    | 0.00      | 0.37      | 0.40      | 0.43 | 0.41 | 0.037896  | 0.000 | 0.421 | 0.396 | 0.00       | 0.00 | 0.00 |      |
| H2A1_4_11 K5me1        | 46.47% | 47.67% | 46.33% | 39.19%  | 46.33%  | 46.33%  | 46.33%    | 46.33%    | 46.33%    | 0.00   | 0.00               | 0.00   | 0.00    | 0.00    | 0.00    | 0.00      | 0.00      | 0.00      | 0.17 | 0.00 | 0.00      | 0.465 | 0.177 | 0.00  | 0.00       | 0.00 | 0.00 |      |
| H2A1_11 unmod          | 20.16% | 35.49% | 30.80% | 30.60%  | 35.57%  | 39.87%  | 17.92%    | 13.91%    | 18.99%    | 0.02   | 0.02               | 0.05   | 0.09    | 0.03    | 0.06    | 0.04      | 0.09      | 0.06      | 0.11 | 0.11 | 0.09      | 0.066 | 0.214 | 0.011 | 0.00       | 0.00 | 0.00 |      |
| H2A1_11 K5ac           | 6.91%  | 19.53% | 25.08% | 25.33%  | 28.87%  | 10.64%  | 11.81%    | 14.80%    | 13.43%    | 0.05   | 0.07               | 0.09   | 0.15    | 0.10    | 0.02    | 0.04      | 0.06      | 0.02      | 0.11 | 0.26 | 0.06      | 0.234 | 0.104 | 0.162 | 0.00       | 0.00 | 0.00 |      |
| H2A1_11 K5acK9ac       | 72.93% | 44.98% | 44.06% | 40.07%  | 31.57%  | 44.49%  | 67.73%    | 53.81%    | 67.34%    | 0.07   | 0.08               | 0.09   | 0.23    | 0.13    | 0.08    | 0.07      | 0.15      | 0.05      | 0.14 | 0.20 | 0.55      | 0.144 | 0.121 | 0.024 | 0.00       | 0.00 | 0.00 |      |
| H2A1_11 unmod          | 85.85% | 86.79% | 89.48% | 83.56%  | 80.93%  | 87.46%  | 82.13%    | 79.53%    | 85.35%    | 0.00   | 0.01               | 0.08   | 0.07    | 0.07    | 0.01    | 0.09      | 0.06      | 0.13      | 0.64 | 0.33 | 0.03      | 0.888 | 0.816 | 0.808 | 0.00       | 0.00 | 0.00 |      |
| H2A1_19 K4ac           | 0.00%  | 1.51%  | 1.79%  | 1.08%   | 0.56%   | 1.05%   | 1.21%     | 0.00%     | 0.00%     | 0.00   | 0.02               | 0.01   | 0.00    | 0.00    | 0.01    | 0.01      | 0.00      | 0.00      | 0.01 | 0.38 | 0.42      | 0.875 | 1.000 | 1.000 | 1.000      | 0.00 | 0.00 | 0.00 |
| H2A1_19 K9ac           | 0.00%  | 0.17%  | 0.79%  | 0.00%   | 0.32%   | 0.18%   | 0.42%     | 0.32%     | 0.00%     | 0.00   | 0.00               | 0.00   | 0.00    | 0.00    | 0.00    | 0.00      | 0.00      | 0.00      | 0.81 | 0.49 | 0.10      | 0.007 | 0.000 | 0.000 | 0.00       | 0.00 | 0.00 |      |
| H2A1_19 K11ac          | 1.77%  | 0.04%  | 2.86%  | 1.87%   | 0.54%   | 1.22%   | 2.21%     | 0.05%     | 0.01%     | 0.00   | 0.01               | 0.02   | 0.01    | 0.00    | 0.00    | 0.00      | 0.00      | 0.00      | 0.96 | 0.26 | 0.10      | 0.855 | 0.266 | 0.076 | 0.00       | 0.00 | 0.00 |      |
| H2A1_19 K15ac          | 2.46%  | 4.29%  | 1.58%  | 3.17%   | 6.93%   | 2.80%   | 5.17%     | 4.52%     | 0.87%     | 0.01   | 0.02               | 0.01   | 0.01    | 0.05    | 0.01    | 0.00      | 0.00      | 0.00      | 0.38 | 0.45 | 0.10      | 0.557 | 0.644 | 0.119 | 0.00       | 0.00 | 0.00 |      |
| H2A1_19 K4acK7ac       | 0.12%  | 0.00%  | 0.04%  | 0.00%   | 0.00%   | 0.00%   | 0.00%     | 0.00%     | 0.00%     | 0.00   | 0.00               | 0.00   | 0.00    | 0.00    | 0.00    | 0.00      | 0.00      | 0.00      | 1.00 | 1.00 | 1.00      | 1.000 | 1.000 | 1.000 | 0.00       | 0.00 | 0.00 |      |
| H2A1_19 K4acK11ac      | 0.00%  | 0.00%  | 0.00%  | 0.00%   | 0.00%   | 0.00%   | 0.00%     | 0.00%     | 0.00%     | 0.00   | 0.00               | 0.00   | 0.00    | 0.00    | 0.00    | 0.00      | 0.00      | 0.00      | 1.00 | 1.00 | 1.00      | 1.000 | 1.000 | 1.000 | 0.00       | 0.00 | 0.00 |      |
| H2A1_19 K4acK15ac      | 0.00%  | 0.00%  | 0.00%  | 0.00%   | 0.00%   | 0.00%   | 0.00%     | 0.00%     | 0.00%     | 0.00   | 0.00               | 0.00   | 0.00    | 0.00    | 0.00    | 0.00      | 0.00      | 0.00      | 1.00 | 1.00 | 1.00      | 1.000 | 1.000 | 1.000 | 0.00       | 0.00 | 0.00 |      |
| H2A1_19 K7acK11ac      | 1.13%  | 0.18%  | 1.30%  | 0.95%   | 0.26%   | 0.69%   | 0.00%     | 0.00%     | 0.00%     | 0.00   | 0.00               | 0.00   | 0.00    | 0.00    | 0.00    | 0.00      | 0.00      | 0.79      | 0.70 | 0.10 | 0.167     | 0.000 | 0.247 | 0.00  | 0.00       | 0.00 |      |      |
| H2A1_19 K7acK15ac      | 0.01%  | 0.00%  | 0.05%  | 0.01%   | 0.01%   | 0.01%   | 0.01%     | 0.01%     | 0.00%     | 0.00   | 0.00               | 0.00   | 0.00    | 0.00    | 0.00    | 0.00      | 0.00      | 0.00      | 1.00 | 1.00 | 1.00      | 1.000 | 1.000 | 1.000 | 0.00       | 0.00 | 0.00 |      |
| H2A1_19 K11acK15ac     | 1.60%  | 0.40%  | 0.98%  | 1.23%   | 1.34%   | 0.76%   | 0.77%     | 0.45%     | 0.00%     | 0.00   | 0.00               | 0.01   | 0.01    | 0.00    | 0.00    | 0.00      | 0.01      | 0.00      | 0.73 | 0.04 | 0.61      | 0.358 | 0.095 | 1.000 | 0.00       | 0.00 | 0.00 |      |
| H2A1_19 K7acK11acK15ac | 0.02%  | 0.66%  | 0.29%  | 0.14%   | 0.01%   | 0.04%   | 0.25%     | 0.00%     | 0.00%     | 0.00   | 0.00               | 0.00   | 0.00    | 0.00    | 0.00    | 0.00      | 0.00      | 0.00      | 0.53 | 0.14 | 0.32      | 0.583 | 1.000 | 1.000 | 0.00       | 0.00 | 0.00 |      |
| H2A1_19 K4acK11acK15ac | 0.00%  | 0.02%  | 0.00%  | 0.00%   | 0.00%   | 0.00%   | 0.02%     | 0.00%     | 0.00%     | 0.00   | 0.00               | 0.00   | 0.00    | 0.00    | 0.00    | 0.00      | 0.00      | 0.00      | 1.00 | 1.00 | 1.00      | 1.000 | 1.000 | 1.000 | 0.00       | 0.00 | 0.00 |      |
| H2A1_19 K4acK15acK11ac | 0.00%  | 0.23%  | 0.42%  | 0.00%   | 0.75%   | 0.00%   | 0.02%     | 0.00%     | 0.00%     | 0.00   | 0.00               | 0.00   | 0.00    | 0.00    | 0.00    | 0.00      | 0.00      | 0.00      | 0.35 | 0.14 | 0.10      | 0.100 | 0.000 | 0.000 | 0.00       | 0.00 | 0.00 |      |
| H2A1_19 K4acK7acK11ac  | 0.09%  | 0.08%  | 0.05%  | 0.53%   | 0.63%   | 0.08%   | 0.04%     | 0.00%     | 0.00%     | 0.00   | 0.00               | 0.00   | 0.00    | 0.00    | 0.00    | 0.00      | 0.00      | 0.00</    |      |      |           |       |       |       |            |      |      |      |

**Table S7.** Effects of MGL50 on PTMs of H2B histone variant in HT-29 cells. Cells were seeded ( $2.5 \times 10^5$  cells/well) into 12-well plates, were treated with 0.03 mg/mL MGL (MGL50) for 24, 48 and 72 h and then were collected. Histones were extracted and peptides were analyzed by mass spectrometry. Data are represented as mean and standard deviation. NT, non-treated; PLP, control vehicle, cells treated with 0.5 mM PLP in PBS; MGL50, concentration of MGL able to reduce cell viability to 50%. Heteroscedastic two-tails t-test are applied and statistical analysis was carried out comparing, at each incubation time, NT vs PLP and PLP vs MGL. \* =  $p \leq 0.05$ ; \*\* =  $p \leq 0.01$  and \*\*\* =  $p \leq 0.001$ . Statistically significant differences are highlighted in green.

| H2B variant                          | mean   |        |        |         |         |         |           |           |           | standard deviation |        |        |         |         |         |           |           |           | NT vs PLP |      |      | PLP vs MGL |       |       |
|--------------------------------------|--------|--------|--------|---------|---------|---------|-----------|-----------|-----------|--------------------|--------|--------|---------|---------|---------|-----------|-----------|-----------|-----------|------|------|------------|-------|-------|
|                                      | NT 24h | NT 48h | NT 72h | PLP 24h | PLP 48h | PLP 72h | MGL50 24h | MGL50 48h | MGL50 72h | NT 24h             | NT 48h | NT 72h | PLP 24h | PLP 48h | PLP 72h | MGL50 24h | MGL50 48h | MGL50 72h | 24h       | 48h  | 72h  | 24h        | 48h   | 72h   |
| H2B18_80_86 unmod                    | 99.94% | 99.79% | 99.88% | 99.92%  | 99.73%  | 99.91%  | 99.67%    | 98.36%    | 96.15%    | 0.00               | 0.00   | 0.00   | 0.00    | 0.00    | 0.00    | 0.00      | 0.00      | 0.03      | 0.18      | 0.73 | 0.42 | 0.120      | 0.001 | 0.126 |
| H2B18_80_86 Y83ac                    | 0.06%  | 0.21%  | 0.12%  | 0.08%   | 0.27%   | 0.09%   | 0.33%     | 1.64%     | 3.85%     | 0.00               | 0.00   | 0.00   | 0.00    | 0.00    | 0.00    | 0.00      | 0.00      | 0.03      | 0.18      | 0.73 | 0.42 | 0.120      | 0.001 | 0.126 |
| H2B1A_81_87 unmod                    | 6.86%  | 10.93% | 21.22% | 8.03%   | 5.86%   | 11.65%  | 20.11%    | 2.68%     | 19.54%    | 0.04               | 0.05   | 0.16   | 0.01    | 0.05    | 0.10    | 0.06      | 0.03      | 0.18      | 0.62      | 0.32 | 0.43 | 0.028      | 0.421 | 0.545 |
| H2B1A_81_87 K86ac                    | 93.14% | 89.07% | 78.78% | 91.97%  | 94.14%  | 88.33%  | 79.89%    | 97.32%    | 80.46%    | 0.04               | 0.05   | 0.16   | 0.01    | 0.05    | 0.10    | 0.06      | 0.03      | 0.18      | 0.62      | 0.32 | 0.43 | 0.028      | 0.421 | 0.545 |
| H2B_1_29 1C.PEPKSAAPAPKKGSKKAVTKAQK  | 44.39% | 35.37% | 56.40% | 50.48%  | 57.04%  | 58.15%  | 54.73%    | 44.74%    | 48.22%    | 0.09               | 0.26   | 0.09   | 0.14    | 0.12    | 0.04    | 0.10      | 0.31      | 0.32      | 0.57      | 0.26 | 0.73 | 0.692      | 0.559 | 0.636 |
| H2B_1_29 1H.PDPKSAAPAPKKGSKKAVTKVQK  | 9.41%  | 6.67%  | 11.96% | 6.33%   | 5.18%   | 13.68%  | 9.05%     | 5.40%     | 5.32%     | 0.03               | 0.06   | 0.03   | 0.06    | 0.08    | 0.02    | 0.12      | 0.09      | 0.09      | 0.47      | 0.81 | 0.45 | 0.751      | 0.976 | 0.201 |
| H2B_1_29 2F.PDPKSAAPAPKKGSKKAVTKVQK  | 2.22%  | 1.40%  | 5.59%  | 11.50%  | 0.80%   | 6.00%   | 3.32%     | 0.45%     | 10.38%    | 0.02               | 0.01   | 0.00   | 0.12    | 0.01    | 0.02    | 0.06      | 0.01      | 0.12      | 0.30      | 0.63 | 0.73 | 0.335      | 0.727 | 0.579 |
| H2B_1_29 1B.PEPKSAAPAPKKGSKKAVTKAQK  | 6.78%  | 32.65% | 4.74%  | 6.79%   | 3.64%   | 0.02%   | 6.11%     | 32.62%    | 10.73%    | 0.06               | 0.47   | 0.08   | 0.06    | 0.05    | 0.00    | 0.05      | 0.40      | 0.19      | 1.00      | 0.40 | 0.42 | 0.894      | 0.334 | 0.423 |
| H2B_1_29 1N.PEPKSAAPAPKKGSKKAVTKAQK  | 10.41% | 8.69%  | 6.60%  | 4.27%   | 6.85%   | 5.23%   | 0.19%     | 0.00%     | 0.00%     | 0.07               | 0.08   | 0.11   | 0.06    | 0.06    | 0.09    | 0.00      | 0.00      | 0.00      | 0.30      | 0.76 | 0.88 | 0.360      | 1.000 | 1.000 |
| H2B_1_29 1D.PEPTKSAAPAPKKGSKKAVTKAQK | 10.63% | 6.95%  | 13.61% | 7.81%   | 12.74%  | 14.25%  | 9.74%     | 4.85%     | 13.77%    | 0.00               | 0.06   | 0.01   | 0.05    | 0.07    | 0.01    | 0.01      | 0.08      | 0.17      | 0.44      | 0.35 | 0.53 | 0.560      | 0.282 | 0.965 |
| H2B_1_29 1M.PEPTKSAAPAPKKGSKKAVTKAQK | 3.80%  | 0.58%  | 1.10%  | 6.61%   | 10.70%  | 2.38%   | 16.64%    | 1.56%     | 11.58%    | 0.03               | 0.01   | 0.01   | 0.02    | 0.11    | 0.01    | 0.17      | 0.03      | 0.14      | 0.20      | 0.26 | 0.29 | 0.407      | 0.241 | 0.383 |
| H2B_1_29 1L.PELAKSAAPAPKKGSKKAVTKAQK | 12.37% | 7.68%  | 0.00%  | 6.21%   | 3.05%   | 0.00%   | 0.22%     | 10.36%    | 0.00%     | 0.04               | 0.08   | 0.00   | 0.03    | 0.04    | 0.00    | 0.00      | 0.11      | 0.00      | 0.10      | 0.42 | 1.00 | 0.079      | 0.349 | 1.000 |

**Table S8.** Effects of MGL50 on PTMs of H3.3 histone variant in HT-29 cells. Cells were seeded ( $2.5 \times 10^5$  cells/well) into 12-well plates, were treated with 0.03 mg/mL MGL (MGL50) for 24, 48 and 72 h and then were collected. Histones were extracted and peptides were analyzed by mass spectrometry. Data are represented as mean and standard deviation. NT, non-treated; PLP, control vehicle, cells treated with 0.5 mM PLP in PBS; MGL50, concentration of MGL able to reduce cell viability to 50%. Heteroscedastic two-tails t-test are applied and statistical analysis was carried out comparing, at each incubation time, NT vs PLP and PLP vs MGL. \* =  $p \leq 0.05$ ; \*\* =  $p \leq 0.01$  and \*\*\* =  $p \leq 0.001$ . Statistically significant differences are highlighted in green.

| H3.3 variant               | mean   |        |        |         |         |         |           |           |              |        | standard deviation |        |         |         |         |           |           |              |           |      | NT vs PLP |       | PLP vs MGL |       |       |
|----------------------------|--------|--------|--------|---------|---------|---------|-----------|-----------|--------------|--------|--------------------|--------|---------|---------|---------|-----------|-----------|--------------|-----------|------|-----------|-------|------------|-------|-------|
|                            | NT 24h | NT 48h | NT 72h | PLP 24h | PLP 48h | PLP 72h | MGL50 24h | MGL50 48h | MGL50 72 24h | NT 24h | NT 48h             | NT 72h | PLP 24h | PLP 48h | PLP 72h | MGL50 24h | MGL50 48h | MGL50 72 24h | NT vs PLP | 48h  | 72h       | 24h   | 48h        | 72h   |       |
| H33_27_40 unmod            | 3.41%  | 3.67%  | 2.89%  | 2.52%   | 3.26%   | 3.12%   | 10.14%    | 11.59%    | 7.42%        | 0.00   | 0.00               | 0.00   | 0.00    | 0.00    | 0.00    | 0.00      | 0.020     | 0.023        | 0.016     | 0.01 | 0.06      | 0.55  | 0.021      | 0.024 | 0.011 |
| H33_27_40 K36me1           | 1.72%  | 2.34%  | 1.62%  | 1.45%   | 1.94%   | 1.59%   | 2.55%     | 1.34%     | 0.06%        | 0.00   | 0.00               | 0.00   | 0.00    | 0.00    | 0.00    | 0.00      | 0.004     | 0.004        | 0.001     | 0.18 | 0.03      | 0.92  | 0.007      | 0.089 | 0.000 |
| H33_27_40 K27me1           | 2.95%  | 3.69%  | 2.64%  | 2.51%   | 3.19%   | 2.57%   | 4.47%     | 2.76%     | 0.52%        | 0.00   | 0.00               | 0.00   | 0.00    | 0.00    | 0.00    | 0.00      | 0.005     | 0.010        | 0.002     | 0.28 | 0.04      | 0.82  | 0.006      | 0.508 | 0.000 |
| H33_27_40 K27me2           | 25.04% | 14.79% | 24.49% | 23.52%  | 22.00%  | 26.37%  | 15.13%    | 25.68%    | 23.55%       | 0.01   | 0.01               | 0.01   | 0.01    | 0.03    | 0.01    | 0.016     | 0.080     | 0.058        | 0.14      | 0.02 | 0.09      | 0.001 | 0.498      | 0.451 |       |
| H33_27_40 K36me2           | 23.46% | 8.39%  | 21.82% | 20.03%  | 9.00%   | 24.24%  | 8.34%     | 7.16%     | 2.57%        | 0.01   | 0.04               | 0.05   | 0.02    | 0.01    | 0.01    | 0.043     | 0.025     | 0.012        | 0.06      | 0.83 | 0.50      | 0.013 | 0.323      | 0.000 |       |
| H33_27_40 K27me3           | 5.40%  | 6.03%  | 4.97%  | 4.81%   | 6.67%   | 5.10%   | 6.73%     | 7.31%     | 10.60%       | 0.00   | 0.00               | 0.01   | 0.00    | 0.01    | 0.00    | 0.008     | 0.012     | 0.021        | 0.05      | 0.20 | 0.85      | 0.017 | 0.435      | 0.043 |       |
| H33_27_40 K36me3           | 0.10%  | 0.69%  | 0.06%  | 0.11%   | 0.10%   | 0.03%   | 0.08%     | 1.05%     | 0.81%        | 0.00   | 0.01               | 0.00   | 0.00    | 0.00    | 0.00    | 0.000     | 0.010     | 0.014        | 0.53      | 0.43 | 0.15      | 0.286 | 0.237      | 0.438 |       |
| H33_27_40 K27me2K36me1     | 10.51% | 13.40% | 12.57% | 12.74%  | 12.71%  | 12.08%  | 12.78%    | 10.87%    | 5.63%        | 0.01   | 0.01               | 0.00   | 0.00    | 0.00    | 0.02    | 0.010     | 0.022     | 0.045        | 0.01      | 0.27 | 0.74      | 0.950 | 0.238      | 0.089 |       |
| H33_27_40 K27me1K36me2     | 5.30%  | 7.96%  | 6.56%  | 5.81%   | 6.95%   | 4.89%   | 7.24%     | 4.99%     | 1.05%        | 0.00   | 0.01               | 0.01   | 0.01    | 0.00    | 0.00    | 0.007     | 0.011     | 0.001        | 0.40      | 0.04 | 0.08      | 0.085 | 0.041      | 0.000 |       |
| H33_27_40 K27me1K36me1     | 1.63%  | 3.38%  | 2.09%  | 2.09%   | 2.09%   | 1.56%   | 2.96%     | 0.13%     | 0.00%        | 0.01   | 0.01               | 0.00   | 0.00    | 0.01    | 0.00    | 0.007     | 0.001     | 0.000        | 0.53      | 0.06 | 0.19      | 0.098 | 0.005      | 1.000 |       |
| H33_27_40 K27me3K36me1     | 2.23%  | 2.97%  | 1.95%  | 2.34%   | 2.84%   | 1.98%   | 3.25%     | 2.92%     | 1.43%        | 0.00   | 0.00               | 0.00   | 0.00    | 0.00    | 0.00    | 0.003     | 0.004     | 0.006        | 0.43      | 0.10 | 0.89      | 0.011 | 0.738      | 0.186 |       |
| H33_27_40 K27me1K36me3     | 2.39%  | 3.85%  | 2.78%  | 2.35%   | 3.36%   | 2.19%   | 2.81%     | 1.70%     | 0.23%        | 0.00   | 0.00               | 0.00   | 0.00    | 0.00    | 0.00    | 0.002     | 0.004     | 0.002        | 0.72      | 0.01 | 0.22      | 0.040 | 0.002      | 0.000 |       |
| H33_27_40 K27me2K36me2     | 10.64% | 15.46% | 10.77% | 14.02%  | 15.32%  | 9.86%   | 15.03%    | 15.80%    | 17.02%       | 0.02   | 0.01               | 0.01   | 0.01    | 0.01    | 0.01    | 0.006     | 0.034     | 0.100        | 0.04      | 0.82 | 0.23      | 0.193 | 0.833      | 0.340 |       |
| H33_27_40 K27me3K36me2     | 3.09%  | 4.49%  | 2.68%  | 3.71%   | 4.31%   | 2.58%   | 3.92%     | 3.47%     | 2.26%        | 0.00   | 0.00               | 0.00   | 0.00    | 0.00    | 0.00    | 0.002     | 0.007     | 0.016        | 0.13      | 0.42 | 0.77      | 0.392 | 0.118      | 0.749 |       |
| H33_27_40 K27ac            | 0.53%  | 0.52%  | 0.50%  | 0.42%   | 0.50%   | 0.40%   | 0.81%     | 0.86%     | 0.75%        | 0.00   | 0.00               | 0.00   | 0.00    | 0.00    | 0.00    | 0.001     | 0.002     | 0.006        | 0.12      | 0.67 | 0.31      | 0.003 | 0.044      | 0.451 |       |
| H33_27_40 S28ph            | 0.07%  | 0.82%  | 0.40%  | 0.35%   | 0.38%   | 0.06%   | 0.72%     | 1.28%     | 25.77%       | 0.00   | 0.00               | 0.00   | 0.00    | 0.00    | 0.00    | 0.002     | 0.000     | 0.223        | 0.02      | 0.53 | 0.00      | 0.072 | 0.633      | 0.184 |       |
| H33_27_40 K27me1S28ph      | 0.00%  | 0.00%  | 0.00%  | 0.00%   | 0.00%   | 0.00%   | 0.00%     | 0.00%     | 0.00%        | 0.00   | 0.00               | 0.00   | 0.00    | 0.00    | 0.00    | 0.000     | 0.000     | 0.000        | 1.00      | 1.00 | 1.00      | 1.000 | 1.000      | 1.000 |       |
| H33_27_40 K27me2S28ph      | 0.09%  | 0.01%  | 0.00%  | 0.05%   | 0.05%   | 0.03%   | 0.00%     | 0.00%     | 0.00%        | 0.00   | 0.00               | 0.00   | 0.00    | 0.00    | 0.00    | 0.000     | 0.000     | 0.000        | 0.43      | 0.19 | 1.00      | 0.265 | 1.000      | 1.000 |       |
| H33_27_40 K27me3S28ph      | 0.04%  | 0.01%  | 0.01%  | 0.05%   | 0.10%   | 0.02%   | 0.02%     | 0.00%     | 0.00%        | 0.00   | 0.00               | 0.00   | 0.00    | 0.00    | 0.00    | 0.000     | 0.000     | 0.000        | 0.53      | 0.29 | 0.12      | 0.100 | 0.281      | 1.000 |       |
| H33_27_40 K27me2S28phK36me | 0.04%  | 0.00%  | 0.01%  | 0.05%   | 0.01%   | 0.01%   | 0.01%     | 0.00%     | 0.00%        | 0.00   | 0.00               | 0.00   | 0.00    | 0.00    | 0.00    | 0.000     | 0.000     | 0.000        | 0.71      | 0.56 | 0.52      | 0.050 | 1.000      | 1.000 |       |
| H33_27_40 K27me3S28phK36me | 0.00%  | 0.13%  | 0.00%  | 0.00%   | 0.15%   | 0.00%   | 0.00%     | 0.00%     | 0.00%        | 0.00   | 0.00               | 0.00   | 0.00    | 0.00    | 0.00    | 0.000     | 0.000     | 0.000        | 0.52      | 0.89 | 1.00      | 1.000 | 1.000      | 1.000 |       |
| H33_27_40 S28ac            | 0.47%  | 5.90%  | 0.20%  | 0.17%   | 3.33%   | 0.02%   | 1.85%     | 0.42%     | 0.00%        | 0.01   | 0.03               | 0.00   | 0.00    | 0.00    | 0.02    | 0.00      | 0.007     | 0.007        | 0.000     | 0.54 | 0.26      | 0.31  | 0.015      | 0.051 | 1.000 |
| H33_27_40 K27me2S28ac      | 0.16%  | 0.02%  | 0.08%  | 0.20%   | 0.12%   | 0.51%   | 0.04%     | 0.02%     | 0.00%        | 0.00   | 0.00               | 0.00   | 0.00    | 0.00    | 0.00    | 0.000     | 0.000     | 0.000        | 0.64      | 0.23 | 0.16      | 0.131 | 0.207      | 1.000 |       |
| H33_27_40 K27me3S28ac      | 0.42%  | 0.84%  | 0.55%  | 0.39%   | 0.62%   | 0.50%   | 0.63%     | 0.54%     | 0.34%        | 0.00   | 0.00               | 0.00   | 0.00    | 0.00    | 0.00    | 0.002     | 0.001     | 0.004        | 0.84      | 0.25 | 0.55      | 0.097 | 0.434      | 0.497 |       |
| H33_27_40 K27me2S28acK36me | 0.31%  | 0.65%  | 0.37%  | 0.29%   | 0.39%   | 0.28%   | 0.48%     | 0.10%     | 0.00%        | 0.00   | 0.00               | 0.00   | 0.00    | 0.00    | 0.00    | 0.001     | 0.001     | 0.000        | 0.83      | 0.09 | 0.17      | 0.053 | 0.011      | 1.000 |       |
